# Supplementary material
Source: MDPI journal article supplement (https://www.mdpi.com/2227-9717/7/6/384)
Supplement: s1 [file s1]

## Supporting Information

### ***Separating electronic from steric effects in ethene/ $\alpha$ -olefin copolymerization: A case study on octahedral [ONNO] Zr-catalysts***

**Francesco Zaccaria<sup>1,2</sup>, Roberta Cipullo<sup>1</sup>, Andrea Correa<sup>1</sup>, Peter H. M. Budzelaar<sup>1</sup>, Vincenzo Busico<sup>1</sup> and Christian Ehm<sup>1,\*</sup>**

<sup>1</sup> Dipartimento di Scienze Chimiche, Università di Napoli Federico II, Via Cintia, 80126 Napoli (Italy)

<sup>2</sup> present address: Dipartimento di Chimica, Biologia e Biotecnologie and CIRCC, Università di Perugia, Via Elce di Sotto 8, 06123 Perugia (Italy)

\* Correspondence: christian.ehm@unina.it

## - Polymerization results

**Table S1.** Experimental results for catalysts **1** in ethene/butene (E/B) copolymerization.

| Entry | Catalyst    | $p(E)$ ,<br>bar | $n(\text{Zr})$ ,<br>$\mu\text{mol}$ | $X_i^{(a)}$ | $X_f^{(a)}$ | $R_p^{(b)}$ | $[\text{B}]_{\text{cop}}^{(c)}$<br>mol% | $10^{-2} \times P_n^{(d)}$ | $r_E$ | $r_B$    | $r_E r_B$ |
|-------|-------------|-----------------|-------------------------------------|-------------|-------------|-------------|-----------------------------------------|----------------------------|-------|----------|-----------|
| 1     | <b>MeMe</b> | 1.1             | 38                                  | 0.0460      | 0.0464      | 0.5         | 24                                      | 1.0                        | 61(6) | 0.011(1) | 0.7(1)    |
| 2     |             | 0.55            | 40                                  | 0.0225      | 0.0241      | 1.0         | 39                                      | 0.91                       | 59(6) | 0.013(1) | 0.7(1)    |
| 3     | <b>MeCl</b> | 1.1             | 37                                  | 0.0472      | 0.0526      | 7           | 32                                      | 0.53                       | 42(4) | 0.021(2) | 0.9(2)    |
| 4     |             | 0.55            | 38                                  | 0.0238      | 0.0278      | 19          | 53                                      | 0.50                       | 34(3) | 0.028(3) | 1.0(2)    |
| 5     | <b>ClMe</b> | 1.1             | 6.0                                 | 0.0543      | 0.0584      | 31          | 37                                      | 0.24                       | 33(3) | 0.037(3) | 1.2(2)    |
| 6     |             | 0.55            | 5.7                                 | 0.0200      | 0.0220      | 15          | 59                                      | 0.27                       | 33(3) | 0.030(3) | 1.0(2)    |
| 7     | <b>ClCl</b> | 1.1             | 4.1                                 | 0.0552      | 0.0610      | 360         | 43                                      | 0.22                       | 22(2) | 0.041(4) | 0.9(2)    |
| 8     |             | 0.55            | 3.9                                 | 0.0233      | 0.0295      | 281         | 71                                      | 0.26                       | 22(2) | 0.068(7) | 1.5(3)    |

In toluene (150mL); 25 °C;  $p(B) = 1.1$  bar; cocatalyst = MAO/TBP ( $[\text{Al}] = 5.4 \times 10^{-2}$  M). E = ethene; B = butene. <sup>(a)</sup> Initial (*i*) and final (*f*) comonomer feeding ratio ( $[\text{E}]/[\text{B}]$ , see also Materials and Methods section); <sup>(b)</sup> Productivity in  $\text{kg}(\text{copolymer}) \times \text{mol}(\text{Zr})^{-1} \times [\text{C}_n\text{H}_{2n}]^{-1} \times \text{h}^{-1}$ ; <sup>(c)</sup> butene content in the copolymer, determined by  $^{13}\text{C}$  NMR; <sup>(d)</sup> average copolymerization degree determined by  $^1\text{H}$  NMR based on the concentration of chain end groups.

- **Buried volume analysis**

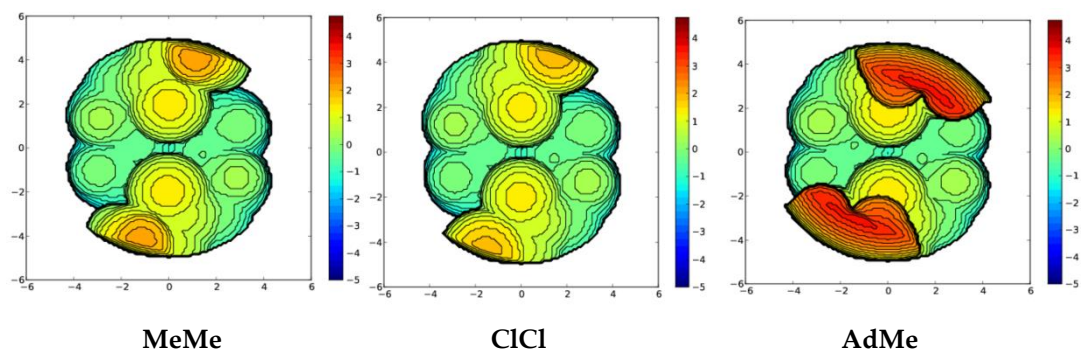

**Figure S1.** Steric heat maps from buried volume analysis for catalysts **MeMe** and **CICI** (see also Table 3). **AdMe** given for comparison

- **Electronic charges**

**Table S6.** Comparison between DFT estimated  $Q_{ZrCl_2}$ , experimental  $r$ -parameters for ethene/butene copolymerization and corresponding  $\Delta\Delta G^\ddagger$  (in kcal/mol).

| Entry | Catalyst    | $Q_{ZrCl_2}$ | $r_E$ | $r_B$ | $\Delta\Delta G^\ddagger_{(EB-EE)}$ | $\Delta\Delta G^\ddagger_{(BE-BB)}$ |
|-------|-------------|--------------|-------|-------|-------------------------------------|-------------------------------------|
| 1     | <b>MeMe</b> | 0.874        | 60    | 0.012 | 2.4                                 | -2.6                                |
| 2     | <b>MeCl</b> | 0.882        | 38    | 0.025 | 2.2                                 | -2.2                                |
| 3     | <b>ClMe</b> | 0.895        | 33    | 0.034 | 2.1                                 | -2.0                                |
| 4     | <b>CICI</b> | 0.904        | 22    | 0.06  | 1.8                                 | -1.7                                |

- Calculated reaction profiles for propene enchainment after ethene

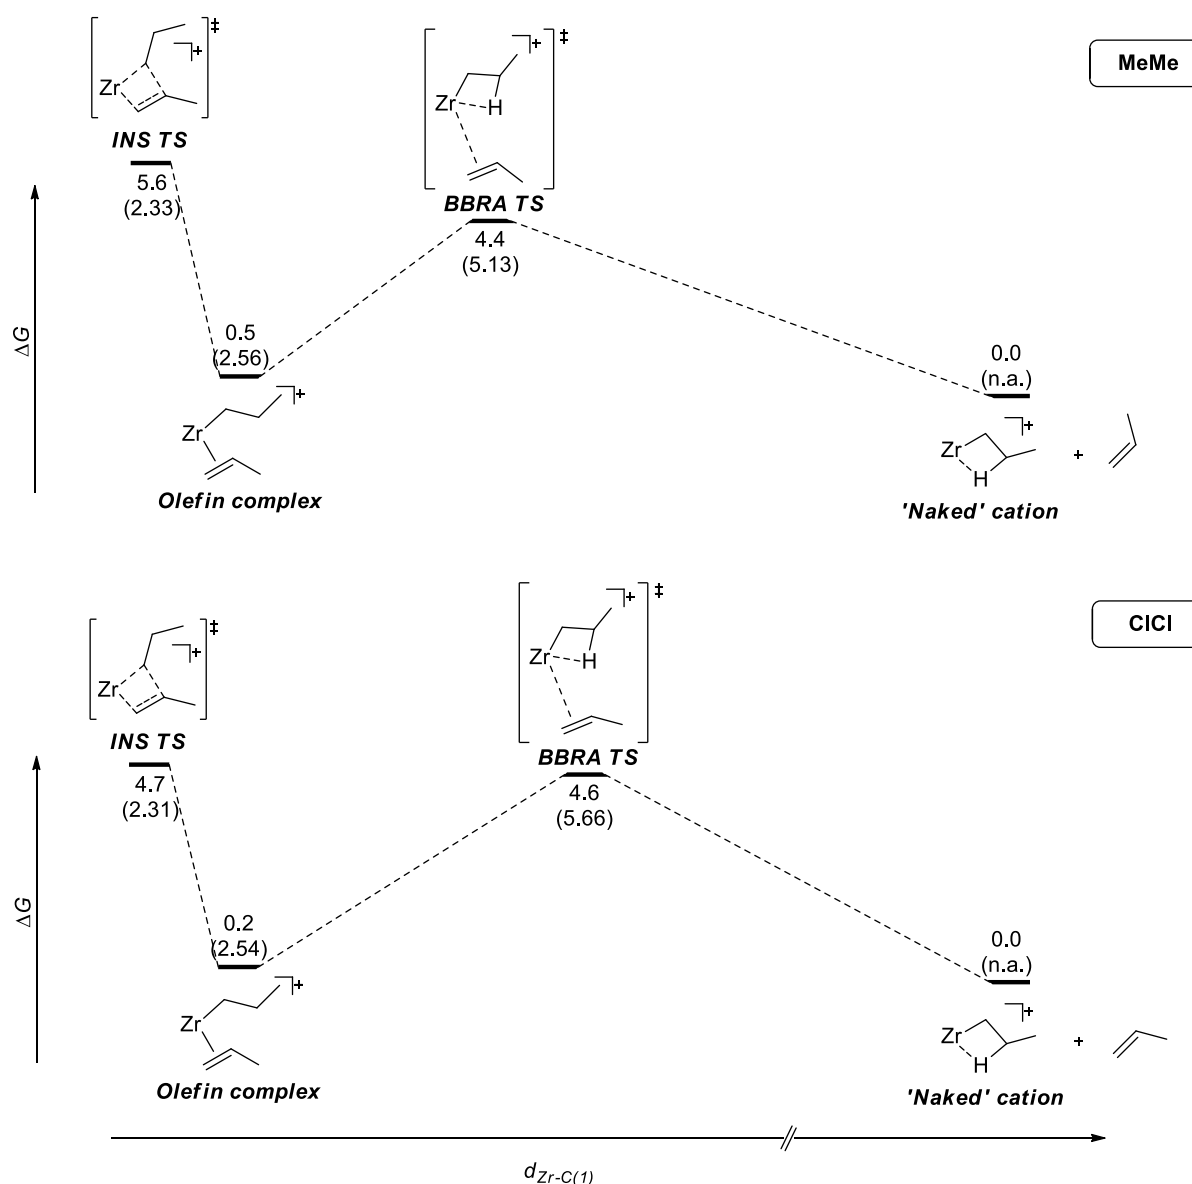

**Figure S2.** Energies profiles for propene enchainment after ethene predicted by DFT for **MeMe** and **CICI**. INS = insertion, BBRA = backbone rearrangement. Numbers are relative Gibbs free energy differences in kcal/mol; numbers in brackets are distances between the Zr center and the C(1) carbon of ethene in Å ( $d_{Zr-C(1)}$ ). A Zr-*n*Pr group is used as model for the Zr-polymeryl after ethene insertion (see Materials and Methods).

- Final energies, entropy and enthalpy corrections in Hartree

| Name                      | Formula         | RI-TPSS/STPSS/DZ |          |                                      |                                     | M06-2X(PCM)/TZ |
|---------------------------|-----------------|------------------|----------|--------------------------------------|-------------------------------------|----------------|
|                           |                 | Energy           | ZPE      | EnthalpyCorr<br>(T=298 K, p=1.0 atm) | EntropyCorr<br>(T=298 K, p=1.0 atm) | Energy         |
| MeMe_ZrCl2                | C22H30Cl2N2O2Zr | -2084.361224     | 0.477314 | 0.510633                             | 0.097763                            | -2083.894133   |
| MeCl_ZrCl2                | C20H24Cl4N2O2Zr | -2924.962856     | 0.404720 | 0.436752                             | 0.093948                            | -2924.495354   |
| ClMe_ZrCl2                | C20H24Cl4N2O2Zr | -2924.956744     | 0.404516 | 0.436729                             | 0.095355                            | -2924.489575   |
| ClCl_ZrCl2                | C18H18Cl6N2O2Zr | -3765.554608     | 0.331533 | 0.362585                             | 0.092789                            | -3765.086479   |
| ethene                    | C2H4            | -78.605619       | 0.050223 | 0.054225                             | 0.024892                            | -78.571775     |
| propene                   | C3H6            | -117.933593      | 0.078307 | 0.083377                             | 0.030094                            | -117.883416    |
| MeMe_nPr                  | C25H37N2O2Zr    | -1282.106400     | 0.566008 | 0.600650                             | 0.099172                            | -1281.645679   |
| MeMe_ethene_nPr           | C27H41N2O2Zr    | -1360.723808     | 0.618557 | 0.657048                             | 0.107795                            | -1360.226474   |
| MeMe_propene_nPr          | C28H43N2O2Zr    | -1400.052269     | 0.645664 | 0.685861                             | 0.111962                            | -1399.541741   |
| MeMe_ethene_nPr_BBRA_TS   | C27H41N2O2Zr    | -1360.714884     | 0.616755 | 0.655883                             | 0.113782                            | -1360.219590   |
| MeMe_ethene_nPr_INS_TS    | C27H41N2O2Zr    | -1360.723311     | 0.619147 | 0.656602                             | 0.105638                            | -1360.225028   |
| MeMe_propene_nPr_BBRA_TS  | C28H43N2O2Zr    | -1400.043321     | 0.644616 | 0.684973                             | 0.117252                            | -1399.531010   |
| MeMe_propene_nPr_INS_TS   | C28H43N2O2Zr    | -1400.047796     | 0.647068 | 0.685808                             | 0.108139                            | -1399.536178   |
| MeMe_ethene_iBu_BBRA_TS   | C28H43N2O2Zr    | -1400.038550     | 0.644204 | 0.684735                             | 0.116505                            | -1399.530246   |
| MeMe_ethene_iBu_INS_TS_A  | C28H43N2O2Zr    | -1400.045024     | 0.646559 | 0.685332                             | 0.107834                            | -1399.534608   |
| MeMe_ethene_iBu_INS_TS_B  | C28H43N2O2Zr    | -1400.043060     | 0.646499 | 0.685301                             | 0.108207                            | -1399.531223   |
| MeMe_propene_iBu_BBRA_TS  | C29H45N2O2Zr    | -1439.366693     | 0.672107 | 0.713804                             | 0.118956                            | -1438.841650   |
| MeMe_propene_iBu_INS_TS_A | C29H45N2O2Zr    | -1439.369398     | 0.674395 | 0.714475                             | 0.110302                            | -1438.845527   |
| MeMe_propene_iBu_INS_TS_B | C29H45N2O2Zr    | -1439.366465     | 0.674487 | 0.714550                             | 0.110697                            | -1438.842006   |
| ClCl_nPr                  | C21H25Cl4N2O2Zr | -2963.289346     | 0.420107 | 0.452528                             | 0.095541                            | -2962.832557   |
| ClCl_ethene_nPr           | C23H29Cl4N2O2Zr | -3041.909112     | 0.472799 | 0.509033                             | 0.103821                            | -3041.414210   |
| ClCl_propene_nPr          | C24H31Cl4N2O2Zr | -3081.238086     | 0.499872 | 0.537787                             | 0.107650                            | -3080.729588   |
| ClCl_ethene_nPr_BBRA_TS   | C23H29Cl4N2O2Zr | -3041.897581     | 0.470831 | 0.507723                             | 0.109791                            | -3041.405952   |
| ClCl_ethene_nPr_INS_TS    | C23H29Cl4N2O2Zr | -3041.908850     | 0.473239 | 0.508483                             | 0.101481                            | -3041.413409   |
| ClCl_propene_nPr_BBRA_TS  | C24H31Cl4N2O2Zr | -3081.226092     | 0.498684 | 0.536829                             | 0.113516                            | -3080.717690   |
| ClCl_propene_nPr_INS_TS   | C24H31Cl4N2O2Zr | -3081.233760     | 0.501232 | 0.537736                             | 0.104123                            | -3080.724799   |
| ClCl_ethene_iBu_BBRA_TS   | C24H31Cl4N2O2Zr | -3081.221779     | 0.498307 | 0.536565                             | 0.112165                            | -3080.717024   |
| ClCl_ethene_iBu_INS_TS_A  | C24H31Cl4N2O2Zr | -3081.230867     | 0.500619 | 0.537195                             | 0.103939                            | -3080.722936   |
| ClCl_ethene_iBu_INS_TS_B  | C24H31Cl4N2O2Zr | -3081.228788     | 0.500535 | 0.537182                             | 0.104653                            | -3080.719601   |

- **Full Gaussian citation**

Gaussian 09, Revision B.01, Frisch, M. J.; Trucks, G. W.; Schlegel, H. B.; Scuseria, G. E.; Robb, M. A.; Cheeseman, J. R.; Scalmani, G.; Barone, V.; Mennucci, B.; Petersson, G. A.; Nakatsuji, H.; Caricato, M.; Li, X.; Hratchian, H. P.; Izmaylov, A. F.; Bloino, J.; Zheng, G.; Sonnenberg, J. L.; Hada, M.; Ehara, M.; Toyota, K.; Fukuda, R.; Hasegawa, J.; Ishida, M.; Nakajima, T.; Honda, Y.; Kitao, O.; Nakai, H.; Vreven, T.; Montgomery, J. A., Jr.; Peralta, J. E.; Ogliaro, F.; Bearpark, M.; Heyd, J. J.; Brothers, E.; Kudin, K. N.; Staroverov, V. N.; Kobayashi, R.; Normand, J.; Raghavachari, K.; Rendell, A.; Burant, J. C.; Iyengar, S. S.; Tomasi, J.; Cossi, M.; Rega, N.; Millam, M. J.; Klene, M.; Knox, J. E.; Cross, J. B.; Bakken, V.; Adamo, C.; Jaramillo, J.; Gomperts, R.; Stratmann, R. E.; Yazyev, O.; Austin, A. J.; Cammi, R.; Pomelli, C.; Ochterski, J. W.; Martin, R. L.; Morokuma, K.; Zakrzewski, V. G.; Voth, G. A.; Salvador, P.; Dannenberg, J. J.; Dapprich, S.; Daniels, A. D.; Farkas, Ö.; Foresman, J. B.; Ortiz, J. V.; Cioslowski, J.; Fox, D. J. Gaussian, Inc., Wallingford CT, 2009.
